# Supplementary material for: Reversible generation of large retractive tensile forces in isometric chemo-mechanical actuators composed of nanocomposite hydrogels and aqueous NaCl solutions
Source: Royal Society of Chemistry journal article supplement (doi:10.1039/c7sm01935a), 2018-01-01
Supplement: c7sm01935a1.pdf [file c7sm01935a1.pdf]

## Supporting Information

# **Reversible generation of large retractive tensile forces in isometric chemo-mechanical actuators composed of nanocomposite hydrogels and aqueous NaCl solutions**

Kazutoshi Haraguchi,<sup>a\*</sup> Yuji Kimura<sup>a</sup> and Shouichi Shimizu<sup>a</sup>

<sup>a</sup>Department of Applied Molecular Chemistry, College of Industrial Technology, Nihon University, 1-2-1 Izumi-cho, Narashino, Chiba 275-8575, Japan.

\*E-mail: haraguchi.kazutoshi@nihon-u.ac.jp

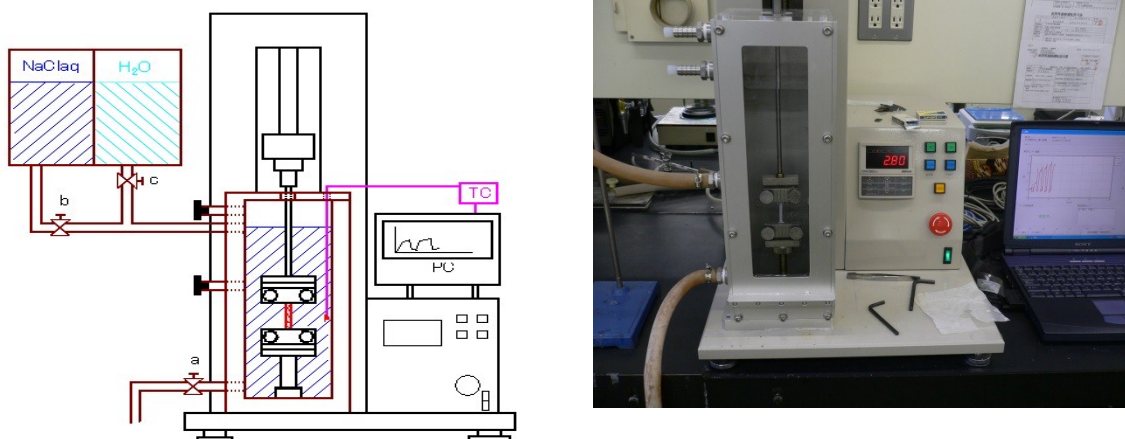

**Fig. S1** Lab-made tensile testing instrument, operable in different aqueous environments. NC gel rod sample is fixed to a constant length (30 mm) by clamping between jaws directly connected to load-cell.

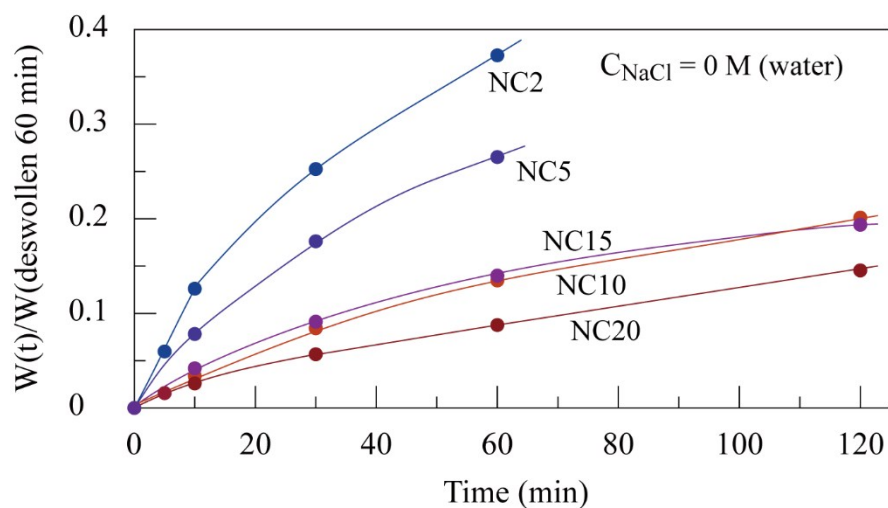

**Fig. S2** Swelling behavior of  $\text{NC}_n\text{-m1}$  gels in water at 20 °C, which were previously deswollen for 60 min in 5-M aqueous NaCl solution (Figure 1b).

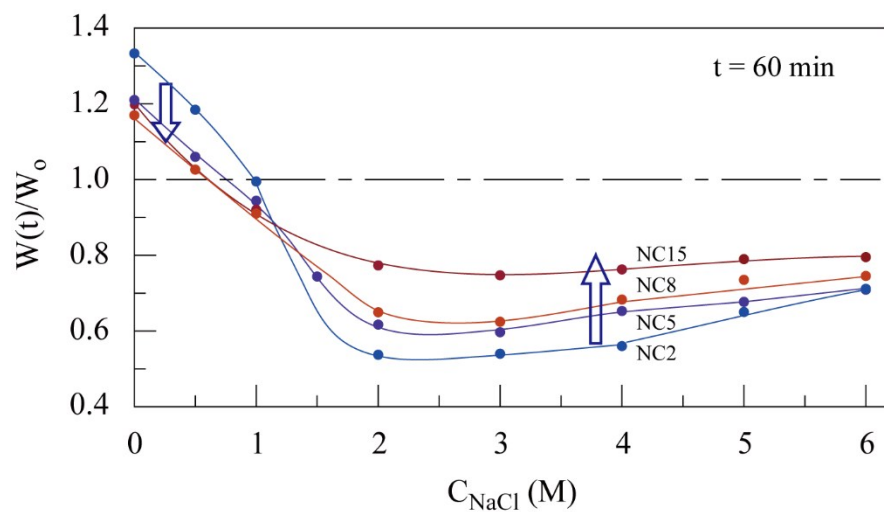

**Fig. S3** Changes in swelling/deswelling behavior for NC $n$ -m1gels with different  $n$  (2–15) under the same conditions with Figure 2b (5-M aqueous NaCl solution, 20 °C, and 60 min).  $W_o$  is the weight of original gel before immersion.
